# Supplementary material for: Matching physical properties of food and tools in three populations of wild capuchin monkeys
Source: Research Square preprint supplement (doi:10.21203/rs.3.rs-1152631/v1), 2021-12-09
Supplement: Supplementary file 1 [file 54bc4931148af628feccc4cd.csv]

Population	Resource	Tool	Hardness	Elasticity
CVNP	Attalea		143.1	3.85186
CVNP	Attalea		259.8	9.99435
CVNP	Attalea		126.8	3.95601
CVNP	Attalea		28.68	1.38881
CVNP	Attalea		282.5	6.98872
CVNP	Attalea		66.93	1.55475
CVNP	Attalea		38.67	1.7659
CVNP	Attalea		38.65	1.04466
CVNP	Attalea		131.8	7.72841
CVNP	Attalea		56.25	6.55033
CVNP	Attalea		207.9	8.90893
CVNP	Attalea		402.2	10.8895
CVNP	Attalea		60.88	1.79622
CVNP	Attalea		89.08	1.66252
CVNP	Attalea		70.87	1.24974
CVNP	Attalea		116	1.69855
CVNP	Attalea		22.6	1.28074
CVNP	Attalea		457.6	7.15293
CVNP	Attalea		186.5	4.29353
CVNP	Attalea		58	0.517053
CVNP	Attalea		86.01	3.65239
CVNP	Attalea		21.26	3.40836
CVNP	Attalea		112.1	4.59502
CVNP	Attalea		60.73	0.96836
SCaNP	Fresh cashew		0.66	0.009405
SCaNP	Fresh cashew		0.41	0.003582
SCaNP	Fresh cashew		0.59	0.021153
SCaNP	Fresh cashew		2.01	0.032636
SCaNP	Fresh cashew		3.498	0.049251
SCaNP	Fresh cashew		1.863	0.038411
SCaNP	Fresh cashew		1.38	0.012251
SCaNP	Fresh cashew		0.8218	0.014394
SCaNP	Fresh cashew		0.3102	0.004257
SCaNP	Manihot		8.871	0.671937
SCaNP	Manihot		159.6	2.60618
SCaNP	Manihot		64.21	0.854472
SCaNP	Manihot		59.16	0.985729
SCaNP	Manihot		46.39	0.72193
SCaNP	Manihot		28.65	0.556014
SCaNP	Manihot		87.15	1.15304
SCaNP	Manihot		115.8	3.60946
SCaNP	Manihot		67.605	7.872
SCaNP	Manihot		126.796	2.946
SCaNP	Manihot		165.676	8.54
SCaNP	Manihot		168.65	5.276
SCaNP	Manihot		183.031	16.784
SCaNP	Manihot		122.356	3.111
SCaNP	Manihot		135.343	5.451
SCaNP	Manihot		179.718	3.684
SCaNP	Manihot		129	2.2335
SCaNP	Manihot		106.8	1.59967
SCaNP	Manihot		74.4	0.780056
SCaNP	Manihot		176.1	3.32775
SCaNP	Manihot		54.01	0.458025
SCaNP	Manihot		80.3	0.839759
SCaNP	Hymenaea		49.37	1.64092
SCaNP	Hymenaea		16.76	0.570633
SCaNP	Hymenaea		34.05	0.850895
SCaNP	Hymenaea		48.69	1.81607
SCaNP	Hymenaea		26.55	0.45359
SCaNP	Hymenaea		35.34	1.17102
SCaNP	Hymenaea		35.06	1.20656
SCaNP	Dry cashew		24.15	0.321371
SCaNP	Dry cashew		17.54	0.271753
SCaNP	Dry cashew		6.29	0.130851
SCaNP	Dry cashew		14.47	0.350353
SCaNP	Dry cashew		6.171	0.161618
SCaNP	Manihot		38.97	0.477043
SCaNP	Manihot		47.15	0.528301
SCaNP	Manihot		34.98	0.803076
SCaNP	Manihot		32.23	0.926358
SCaNP	Manihot		66.35	0.656929
SCaNP	Manihot		46.28	0.696342
SCaNP	Manihot		85.37	1.24628
SCaNP	Manihot		30.52	0.475914
SCaNP	Manihot		43.24	0.569741
SCaNP	Manihot		46.96	0.745311
SCaNP	Manihot		42.43	0.78073
SCaNP	Manihot		65.26	0.865614
SCaNP	Manihot		45.46	0.924426
SCaNP	Manihot		34.57	0.714831
SCaNP	Manihot		60.43	0.86755
SCaNP	Manihot		109.2	2.03827
SCaNP	Manihot		59.91	1.42069
SCaNP	Manihot		69.88	1.6075
SCaNP	Manihot		114.5	1.94887
SCaNP	Manihot		122.8	1.2564
SCaNP	Manihot		57.7	0.870458
SCoNP	Fresh cashew		0.6951	0.019018
SCoNP	Fresh cashew		0.2494	0.006807
SCoNP	Fresh cashew		0.599	0.010346
SCoNP	Fresh cashew		0.45	0.024954
SCoNP	Fresh cashew		0.4	0.015372
SCoNP	Fresh cashew		0.14	0.005654
SCoNP	Fresh cashew		0.92	0.021815
SCoNP	Fresh cashew		0.19	0.003294
SCoNP	Fresh cashew		0.62	0.016827
SCoNP	Fresh cashew		0.4645	0.014088
SCoNP	Fresh cashew		0.2775	0.009602
SCoNP	Fresh cashew		0.2299	0.017197
SCoNP	Fresh cashew		1.095	0.053881
SCoNP	Dry cashew		3.713	0.037928
SCoNP	Dry cashew		1.889	0.082348
SCoNP	Dry cashew		3.341	0.083668
SCoNP	Dry cashew		10.28	0.179091
SCoNP	Dry cashew		3.79	0.063449
SCoNP	Dry cashew		2.58	0.032832
SCoNP	Buchenavia		13.26	0.228228
SCoNP	Buchenavia		53.43	0.39577
SCoNP	Buchenavia		3.561	0.134607
SCoNP	Buchenavia		10.58	0.144032
SCoNP	Buchenavia		76.66	1.61097
SCoNP	Buchenavia		47.79	1.1279
SCoNP	Buchenavia		79.75	0.981542
SCoNP	Buchenavia		80.77	1.60391
SCoNP	Buchenavia		60.1	0.61267
SCoNP	Buchenavia		89.27	0.89194
SCoNP	Hymenaea		21.48	0.4432
SCoNP	Hymenaea		25.2	0.503597
SCoNP	Hymenaea		17.86	0.45153
SCoNP	Hymenaea		77.62	1.68353
SCoNP	Hymenaea		44.42	0.726631
SCoNP	Hymenaea		71.5	1.48106
SCoNP	Hymenaea		37.65	0.71203
SCoNP	Hymenaea		48.21	0.98761
SCoNP	Hymenaea		38.96	0.770672
SCoNP	Manihot		86.3	1.34915
SCoNP	Manihot		256.8	4.12651
SCoNP	Manihot		364.9	1.82448
SCoNP	Manihot		277.8	4.02516
SCoNP	Manihot		135.8	1.28883
SCoNP	Manihot		126.8	2.11333
SCoNP	Manihot		99.38	1.35724
SCoNP	Manihot		237	1.53411
SCoNP	Manihot		72.16	0.887694
SCoNP	Manihot		222.7	3.84715
SCoNP	Manihot		150.5	1.38502
SCoNP	Manihot		128.7	2.17406
SCoNP	Manihot		250.2	5.17116
SCoNP	Manihot		312.2	2.81293
SCoNP	Manihot		172.7	1.92994
SCoNP	Manihot		178.4	1.51842
SCoNP	Manihot		149.2	1.13793
SCoNP	Manihot		60.33	1.20323
SCoNP	Manihot		117.6	0.721545
SCoNP	Manihot		129.7	2.42087
SCoNP	Manihot		125.1	1.86579
SCoNP	Manihot		127.1	2.06078
SCoNP	Manihot		139.2	0.89596
SCoNP	Manihot		212.9	2.0618
SCoNP	Manihot		150.2	1.02984
SCoNP	Manihot		191.9	2.67886
SCoNP	Manihot		55.18	0.443348
SCoNP	Manihot		179.1	2.30182
SCoNP	Manihot			1.63263
CVNP	Hymenaea		381.8	4.78483
CVNP	Hymenaea		29.52	0.621553
CVNP	Hymenaea		21.21	0.584059
CVNP	Hymenaea		19.53	0.415916
CVNP	Hymenaea		26.06	0.598388
SCaNP	Fresh cashew	200.6
SCaNP	Fresh cashew	333.7
SCaNP	Fresh cashew	67
SCaNP	Fresh cashew	65.6
SCaNP	Fresh cashew	62.8
SCaNP	Fresh cashew	170.7
SCaNP	Fresh cashew	101.6
SCaNP	Fresh cashew	87.5
SCaNP	Fresh cashew	206.5
SCaNP	Fresh cashew	374.2
SCaNP	Fresh cashew	658.4
SCaNP	Fresh cashew	67
SCaNP	Fresh cashew	43.6
SCaNP	Fresh cashew	87
SCaNP	Fresh cashew	192.2
SCaNP	Fresh cashew	200.1
SCaNP	Fresh cashew	231.8
SCaNP	Fresh cashew	103.5
SCaNP	Fresh cashew	334.3
SCaNP	Fresh cashew	555.6
SCaNP	Fresh cashew	194.7
SCaNP	Fresh cashew	167.2
SCaNP	Dry cashew	159.3
SCaNP	Dry cashew	297.3
SCaNP	Dry cashew	194.9
SCaNP	Dry cashew	323
SCaNP	Dry cashew	35.4
SCaNP	Dry cashew	100.6
SCaNP	Dry cashew	50.8
SCaNP	Dry cashew	89.6
SCaNP	Dry cashew	124.7
SCaNP	Dry cashew	67.3
SCaNP	Dry cashew	396.8
SCaNP	Dry cashew	402.8
SCaNP	Dry cashew	189
SCaNP	Manihot	70.5
SCaNP	Manihot	20
SCaNP	Manihot	54.9
SCaNP	Manihot	166.7
SCaNP	Manihot	42.9
SCaNP	Manihot	158.8
SCaNP	Manihot	55.4
SCaNP	Manihot	29.5
SCaNP	Manihot	306.4
SCaNP	Manihot	48.9
SCaNP	Manihot	71
SCaNP	Manihot	121
SCaNP	Manihot	1017
SCaNP	Manihot	120
SCaNP	Manihot	190
SCaNP	Manihot	52.9
SCaNP	Manihot	130
SCaNP	Manihot	943.5
SCaNP	Manihot	110
SCaNP	Manihot	271.5
SCoNP	Manihot	97.2
SCoNP	Manihot	120.1
SCoNP	Manihot	633
SCoNP	Manihot	61.2
SCoNP	Manihot	111.2
SCoNP	Manihot	82
SCaNP	Manihot	204
SCaNP	Manihot	98
SCoNP	Manihot	100
SCoNP	Manihot	291.1
SCoNP	Manihot	272.8
SCoNP	Manihot	284
SCoNP	Manihot	89.5
SCoNP	Manihot	255
SCoNP	Manihot	199.7
SCaNP	Manihot	185
SCoNP	Manihot	137.8
SCoNP	Manihot	256.4
SCaNP	Manihot	159
SCaNP	Manihot	102.3
SCaNP	Manihot	169.2
SCaNP	Manihot	78.8
SCoNP	Manihot	579
SCaNP	Manihot	87.1
SCaNP	Manihot	159.3
SCaNP	Manihot	264.3
SCoNP	Manihot	413.9
SCoNP	Manihot	199
SCoNP	Manihot	31.4
SCoNP	Manihot	213.2
CVNP	Attalea	1397
CVNP	Attalea	3700
CVNP	Attalea	1950
CVNP	Attalea	1117
CVNP	Attalea	2100
CVNP	Attalea	2010
CVNP	Attalea	5700
CVNP	Attalea	3400
CVNP	Attalea	1245
CVNP	Attalea	2050
CVNP	Attalea	788
CVNP	Attalea	650
CVNP	Attalea	777
CVNP	Attalea	1486
CVNP	Attalea	2500
CVNP	Attalea	2500
CVNP	Attalea	1444
CVNP	Attalea	2150
CVNP	Attalea	292
CVNP	Attalea	2050
CVNP	Attalea	1950
CVNP	Attalea	467.4
CVNP	Attalea	795
CVNP	Attalea	355
CVNP	Attalea	735
CVNP	Attalea	883
CVNP	Attalea	734
CVNP	Attalea	3350
CVNP	Attalea	2650
CVNP	Attalea	2850
CVNP	Attalea	746
CVNP	Attalea	365
CVNP	Attalea	4050
CVNP	Attalea	1421
CVNP	Attalea	5050
CVNP	Attalea	1380
CVNP	Attalea	2250
CVNP	Attalea	2550
CVNP	Attalea	2800
CVNP	Attalea	1237
CVNP	Attalea	3300
CVNP	Attalea	1283
CVNP	Attalea	411
CVNP	Attalea	2700
CVNP	Attalea	1950
CVNP	Attalea	2200
CVNP	Attalea	1250
CVNP	Attalea	984
CVNP	Attalea	1219
CVNP	Attalea	3750
CVNP	Attalea	1700
CVNP	Attalea	1026
CVNP	Attalea	406
CVNP	Attalea	1570
CVNP	Attalea	266
CVNP	Attalea	1233
CVNP	Attalea	4400
CVNP	Attalea	2800
CVNP	Attalea	2750
CVNP	Attalea	666
CVNP	Attalea	1468
CVNP	Attalea	1498
CVNP	Attalea	1080
CVNP	Attalea	1349
CVNP	Attalea	869
CVNP	Attalea	1063
CVNP	Attalea	1088
CVNP	Attalea	806
CVNP	Attalea	1156
CVNP	Attalea	2250
CVNP	Attalea	825
CVNP	Attalea	1698
CVNP	Attalea	1060
CVNP	Attalea	1626
CVNP	Attalea	1157
CVNP	Attalea	668
CVNP	Attalea	4700
CVNP	Attalea	964
CVNP	Attalea	1723
CVNP	Attalea	1727
CVNP	Attalea	1267
CVNP	Attalea	1823
CVNP	Attalea	2292.2
CVNP	Attalea	2600
CVNP	Attalea	1700
CVNP	Attalea	1790
CVNP	Attalea	748.7
CVNP	Attalea	1170.8
CVNP	Attalea	2678
CVNP	Attalea	1181.2
CVNP	Attalea	464
CVNP	Attalea	3150
CVNP	Attalea	1120.5
CVNP	Attalea	1900
CVNP	Attalea	2850
CVNP	Attalea	281.6
CVNP	Attalea	3400
CVNP	Attalea	903
CVNP	Attalea	630.7
CVNP	Attalea	1767
CVNP	Attalea	1210
CVNP	Attalea	2300
CVNP	Attalea	4650
CVNP	Attalea
CVNP	Attalea	2260
CVNP	Attalea	2530.6
CVNP	Attalea	1991
CVNP	Attalea	2000
CVNP	Attalea	1651
CVNP	Attalea	1548
CVNP	Attalea	2100
CVNP	Attalea	4250
CVNP	Attalea	2200
CVNP	Attalea	2150
CVNP	Attalea	783
CVNP	Attalea	1829
CVNP	Attalea	3500
CVNP	Attalea	1568
CVNP	Attalea	1580
CVNP	Attalea	1790
CVNP	Attalea	1590
CVNP	Attalea	654
CVNP	Attalea	1616
CVNP	Attalea	2900
CVNP	Attalea	1020
CVNP	Attalea	1368
CVNP	Attalea	998
CVNP	Attalea	1522
CVNP	Attalea	1969
CVNP	Attalea	859
CVNP	Attalea	1566
CVNP	Attalea	3100
CVNP	Attalea	845
CVNP	Attalea	1802
CVNP	Attalea	1125
CVNP	Attalea	2052
CVNP	Attalea	1032
CVNP	Attalea	1111
CVNP	Attalea	1706
CVNP	Attalea	1542
CVNP	Attalea	826
CVNP	Attalea	1430
CVNP	Attalea	1173
CVNP	Attalea	852
CVNP	Attalea	637
CVNP	Attalea	1755
CVNP	Attalea	373
CVNP	Attalea	666
CVNP	Attalea	685
CVNP	Attalea	1746
CVNP	Attalea	4100
CVNP	Attalea	1121
CVNP	Attalea	588
CVNP	Attalea	3150
CVNP	Attalea	1033
CVNP	Attalea	1680
CVNP	Attalea	1900
CVNP	Attalea	1495
CVNP	Attalea	1983
CVNP	Attalea	867
CVNP	Attalea	3600
CVNP	Attalea	1538
CVNP	Attalea	715
CVNP	Attalea	1654
CVNP	Attalea	884
CVNP	Attalea	1400
SCaNP	Hymenaea	308
SCaNP	Hymenaea	214
SCaNP	Hymenaea	356
SCaNP	Hymenaea	223
SCaNP	Hymenaea	259
SCaNP	Hymenaea	565
SCaNP	Hymenaea	67
SCaNP	Hymenaea	116
SCaNP	Hymenaea	209
SCaNP	Hymenaea	334
SCoNP	Hymenaea	80.6
SCoNP	Hymenaea	771
SCoNP	Hymenaea	121.1
SCoNP	Hymenaea	242.4
SCoNP	Hymenaea	644.2
SCoNP	Hymenaea	551.8
SCoNP	Hymenaea	1409
SCoNP	Hymenaea	260
SCoNP	Hymenaea	312
SCoNP	Hymenaea	386
SCoNP	Hymenaea	41
SCoNP	Hymenaea	217
SCoNP	Hymenaea	173.5
SCoNP	Hymenaea	184.2
SCoNP	Hymenaea	190.3
SCoNP	Hymenaea	266.3
SCoNP	Hymenaea	580.2
SCoNP	Hymenaea	190.6
SCoNP	Hymenaea	143.8
SCoNP	Hymenaea	553.9
SCoNP	Hymenaea	147
SCoNP	Hymenaea	146.1
SCoNP	Hymenaea	422.9
SCoNP	Hymenaea	111
SCoNP	Hymenaea	204
SCoNP	Hymenaea	1018
CVNP	Hymenaea	1630
CVNP	Hymenaea	335
CVNP	Hymenaea	852
SCoNP	Hymenaea	470.5
SCaNP	Hymenaea	290
CVNP	Hymenaea	1228
SCaNP	Hymenaea	200
SCaNP	Hymenaea	160
SCaNP	Hymenaea	188
SCoNP	Hymenaea	117.5
SCoNP	Buchenavia	79.7
SCoNP	Buchenavia	623.1
SCoNP	Buchenavia	375.6
SCoNP	Buchenavia	162.7
SCoNP	Buchenavia	739.2
SCoNP	Buchenavia	282.2
SCoNP	Buchenavia	603
SCoNP	Buchenavia	666
SCoNP	Buchenavia	352.2
SCoNP	Buchenavia	168.4
SCoNP	Buchenavia	69.6
SCoNP	Buchenavia	326.9
SCoNP	Buchenavia	248.6
SCoNP	Buchenavia	101
SCoNP	Buchenavia	638.2
SCoNP	Buchenavia	118
SCoNP	Buchenavia	483
SCoNP	Buchenavia	118.6
